# Supplementary material for: Tyrosine based cationic acrylates as potent antimicrobial agents against shigellosis
Source: Royal Society of Chemistry journal article supplement (doi:10.1039/c8bm01588k), 2019-01-01
Supplement: c8bm01588k1.pdf [file c8bm01588k1.pdf]

## Electronic Supplementary Information

# Tyrosine Based Cationic Acrylates as potent Antimicrobial Agent

Lakshmi Priya Datta, Debanjan Dutta, Arpita Chakraborty and Tapan Kumar Das\*

Department of Biochemistry & Biophysics, University of Kalyani

Kalyani, Nadia - 741235, Nadia, West Bengal, India

\*Corresponding Author: E-mail: [tapandas@klyuniv.ac.in](mailto:tapandas@klyuniv.ac.in)

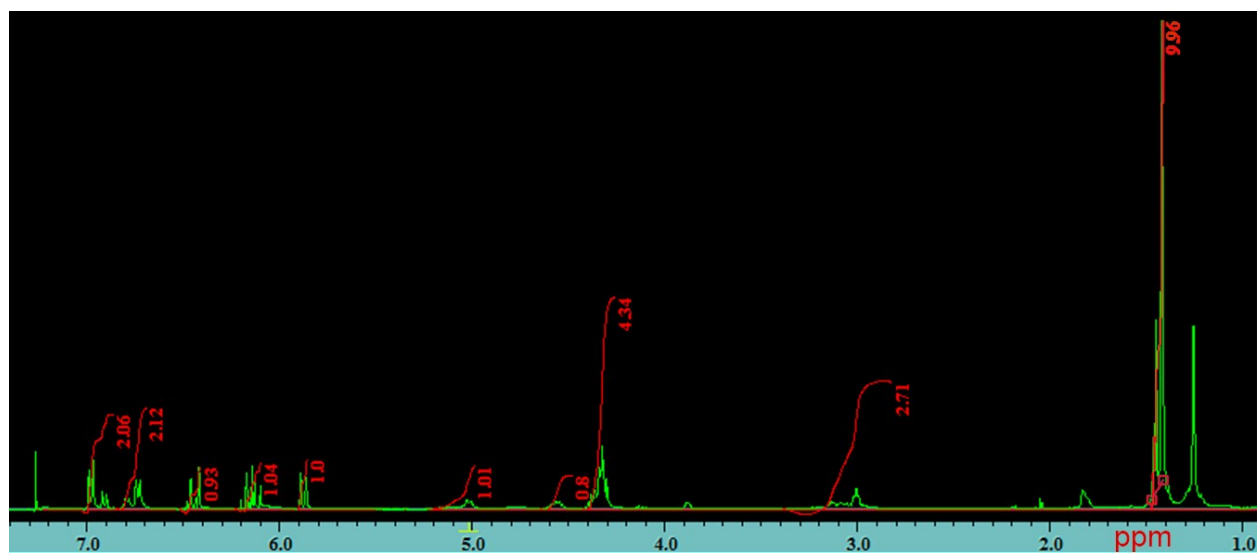

**Figure S1.**  $^1\text{H}$  NMR spectrum of monomer in  $\text{CDCl}_3$ ,

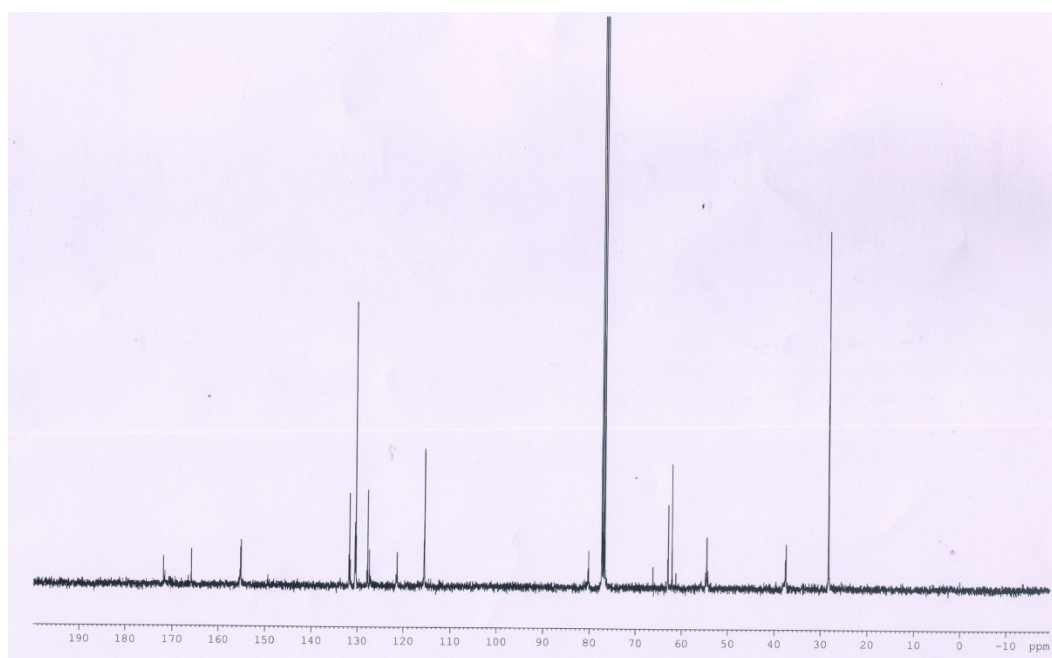

**Figure S2.**  $^{13}\text{C}$  NMR spectrum of monomer in  $\text{CDCl}_3$ ,

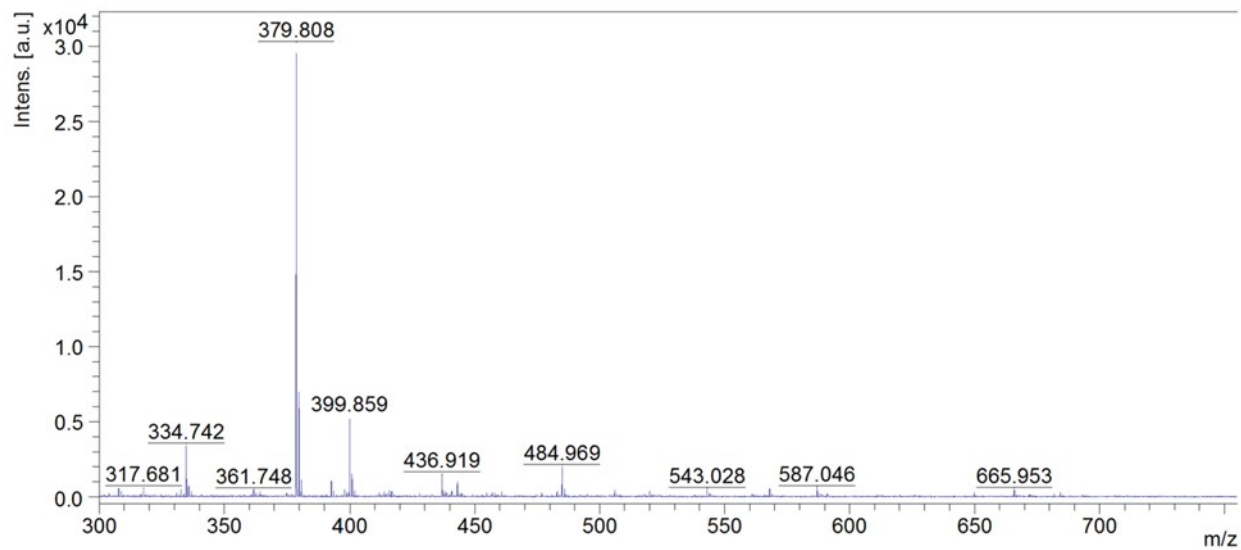

**Figure S3.** MALDI-ToF spectrum of monomer

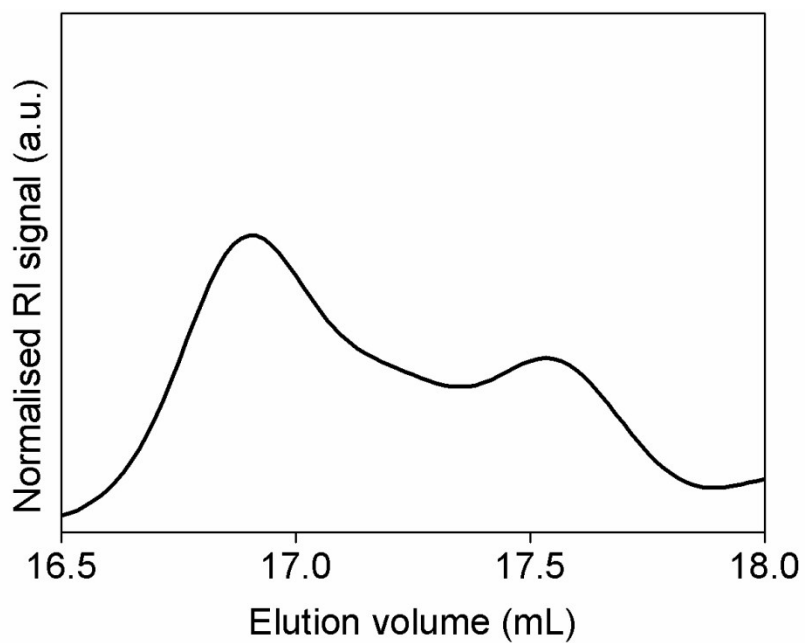

**Figure S4.** GPC RI traces of the homopolymers synthesized via free radical polymerization technique.

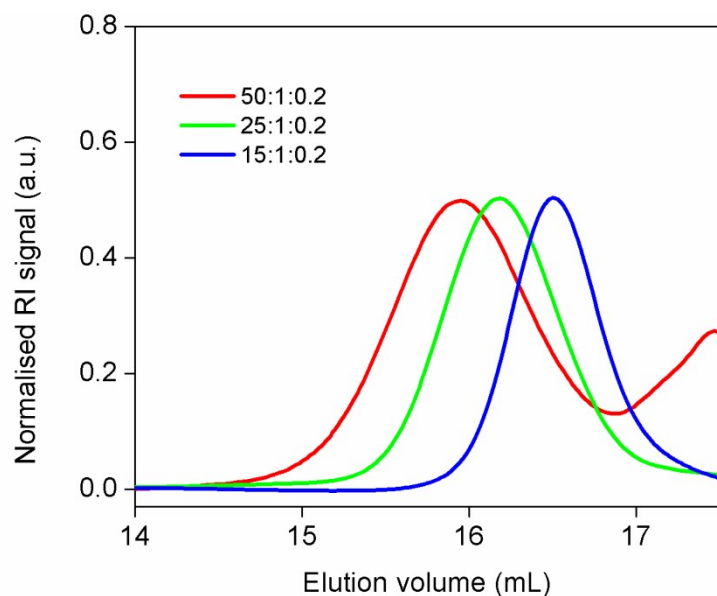

**Figure S5.** GPC RI traces of the homopolymers synthesized using CTP as chain transfer agent (CTA).

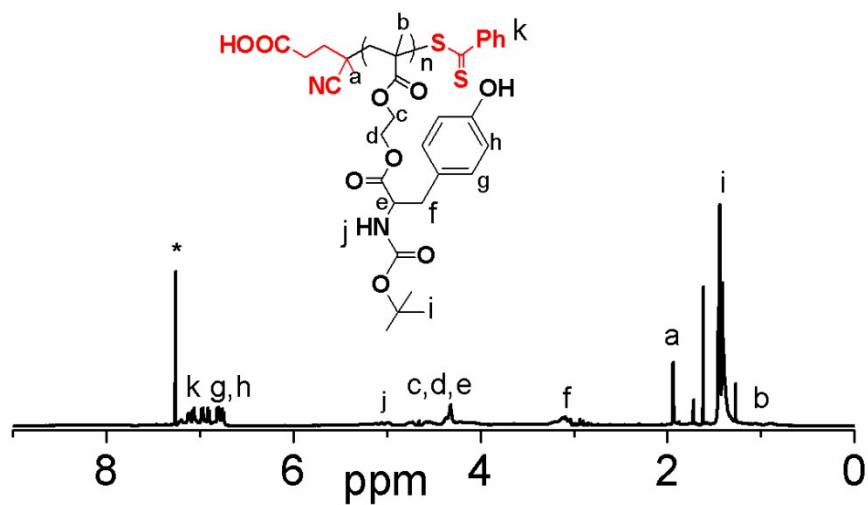

**Figure S6.**  $^1\text{H}$  NMR spectra of the homopolymer synthesized using CTP as chain transfer agent (CTA) in  $\text{CDCl}_3$ .

**Table S1.** Results from the synthesis of P(Boc-Tyr-HEA) homopolymer with CDP as CTA in DMF at 70 °C.

| Expt. No. | [M]/[CTA]/[AIBN]            | Time (h) | Conv. <sup>b</sup> (%) | $M_{n, GPC}^c$ (g/mol) | $\bar{D}$ | $M_{n, NMR}^d$ (g/mol) | $M_{n, theo}^e$ (g/mol) |
|-----------|-----------------------------|----------|------------------------|------------------------|-----------|------------------------|-------------------------|
| 1         | 15:1:0.2 <sup>a</sup> (P15) | 7        | 71                     | 5100                   | 1.13      | 4500                   | 4000                    |
| 2         | 25:1:0.2 <sup>a</sup> (P25) | 7        | 68                     | 7800                   | 1.27      | 7000                   | 6420                    |
| 4         | 50:1:0.2 <sup>a</sup> (P50) | 7        | 76                     | 12700                  | 1.37      | ND                     | 14400                   |
| 5         | 75:1:0.2 <sup>a</sup> (P75) | 7        | 72                     | 20500                  | 1.49      | ND                     | 25000                   |

<sup>a</sup>[Monomer (M)]/[CTA]/[AIBN]=(Boc-Tyr-HEA)/[CDP]/[AIBN]., <sup>b</sup>Determined by gravimetric analysis. <sup>c</sup>Measured by GPC. <sup>d</sup>Obtained from <sup>1</sup>H NMR study. <sup>e</sup> $M_{n, theo} = (([M]/[CTA] \times \text{molecular weight (M}_w) \text{ of M} \times \text{conversion}) + (\text{M}_w \text{ of CTA}))$ . ND= Not determined.

**Table S2.** Solubility of P(Boc-Tyr-HEA) and P(H<sub>3</sub>N<sup>+</sup>-Tyr-HEA) in different solvents.<sup>a</sup>

| Solvent         | P(Boc-Tyr-HEA) | P(H <sub>3</sub> N <sup>+</sup> -Tyr-HEA) |
|-----------------|----------------|-------------------------------------------|
| Water           | -              | +                                         |
| Hexanes         | -              | -                                         |
| Pet ether       | -              | -                                         |
| Diethyl ether   | -              | -                                         |
| Ethyl acetate   | +              | -                                         |
| Benzene         | +              | -                                         |
| Toluene         | +              | -                                         |
| THF             | +              | -                                         |
| DMF             | +              | +                                         |
| DMSO            | +              | +                                         |
| Methanol        | +              | +                                         |
| Ethanol         | +              | +                                         |
| Dichloromethane | +              | -                                         |
| Acetone         | +              | +                                         |
| Acetonitrile    | +              | -                                         |
| Chloroform      | +              | -                                         |
| Dioxane         | +              | -                                         |

<sup>a</sup>The symbols (+) and (-) indicate soluble and insoluble, respectively.

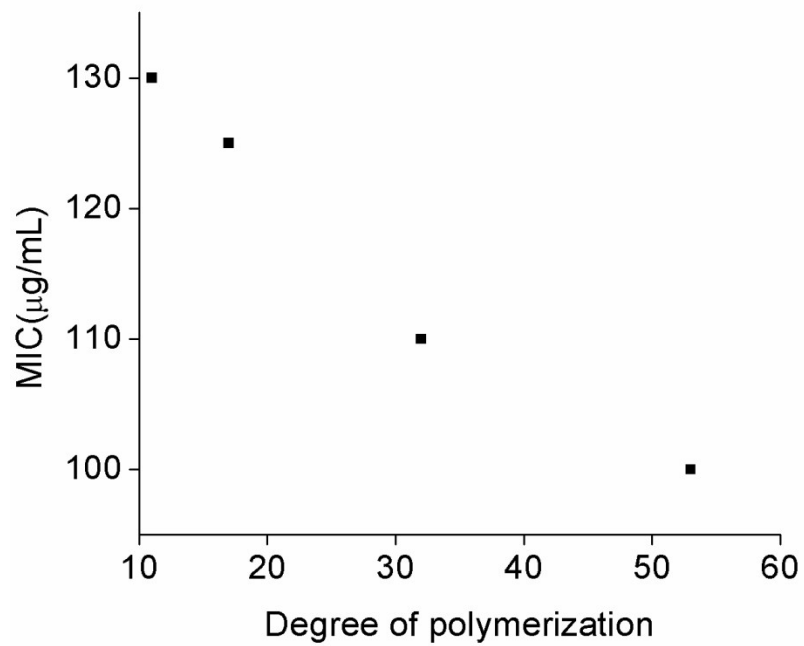

**Figure S7.** Antimicrobial activity of P15, P25, P50 and P75 cationic homopolymers

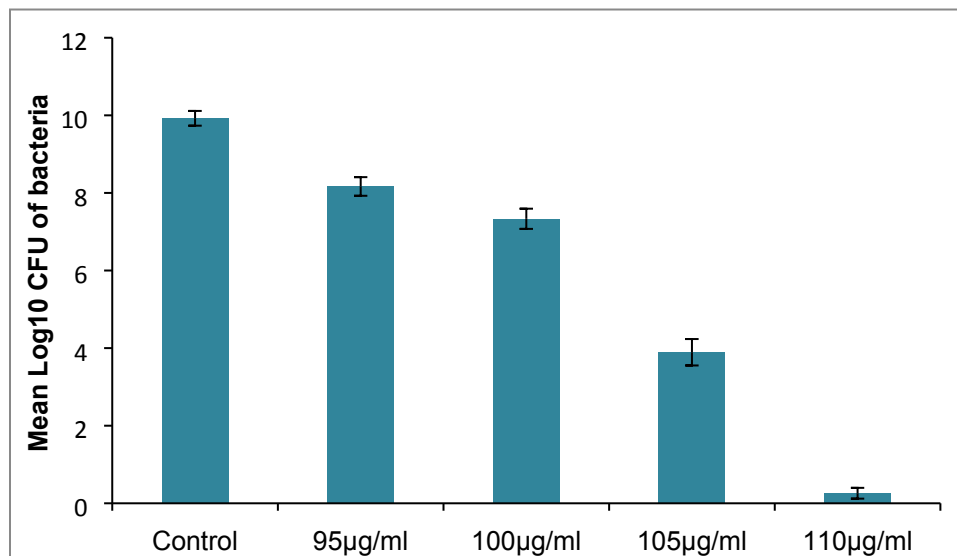

**Figure S8.** MIC and MBC of P75 polymer against *S. flexneri* cell line

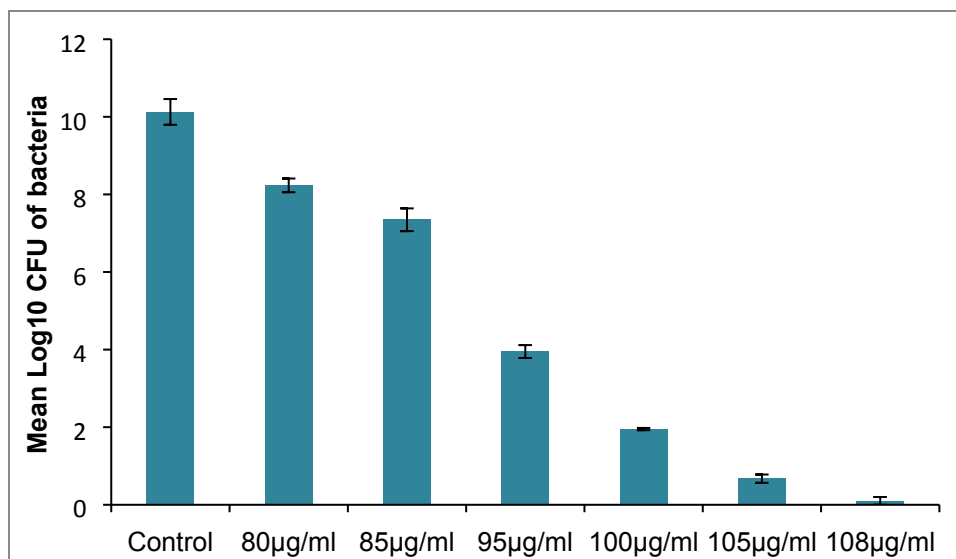

**Figure S9.** MIC and MBC of P75 polymer against *E. coli* cell line

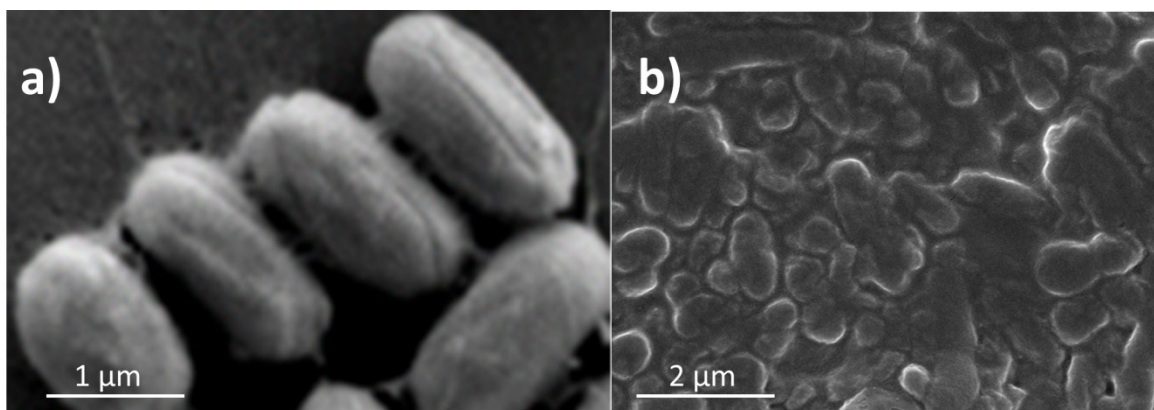

**Figure S10.** FESEM images of *E. coli* cell a) control cells without any treatment. b) after treatment with P75 polymer at their MBC value

Table S3. Quantitative values of Zone of inhibition of P75 against *A. niger*.

| Polymer | Concentration (µg/mL) | Radius of zone of inhibition (R) (cm) | Area of zone of inhibition (cm <sup>2</sup> ) <sup>a</sup> |
|---------|-----------------------|---------------------------------------|------------------------------------------------------------|
|---------|-----------------------|---------------------------------------|------------------------------------------------------------|

|                                           |    |      |      |
|-------------------------------------------|----|------|------|
| P(H <sub>3</sub> N <sup>+</sup> -Tyr-HEA) | 15 | 0.65 | 1.29 |
|                                           | 20 | 0.8  | 1.97 |
|                                           | 50 | 1.01 | 3.17 |

Zone of inhibition =  $\pi(R^2-r^2)$ , R = radius of zone of inhibition, r = radius of well = 0.1 cm.

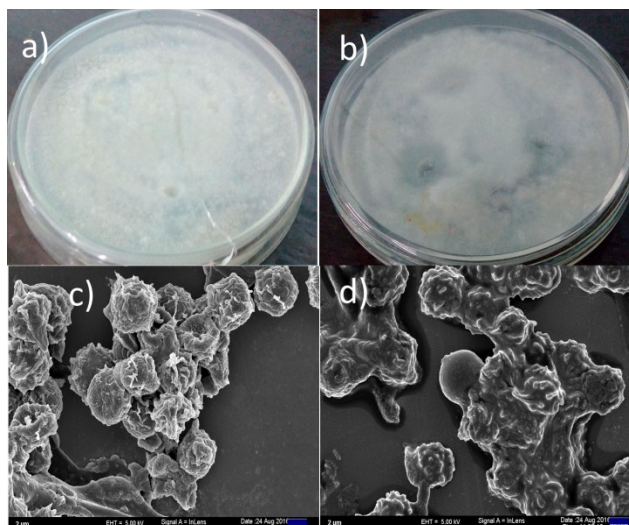

**Figure S11.** Zone of inhibition study of P75 over *A. niger* cells a) control cells, b) cells treated with polymer, c) control *A. niger* cells, b) polymer treated cells within zone of inhibition

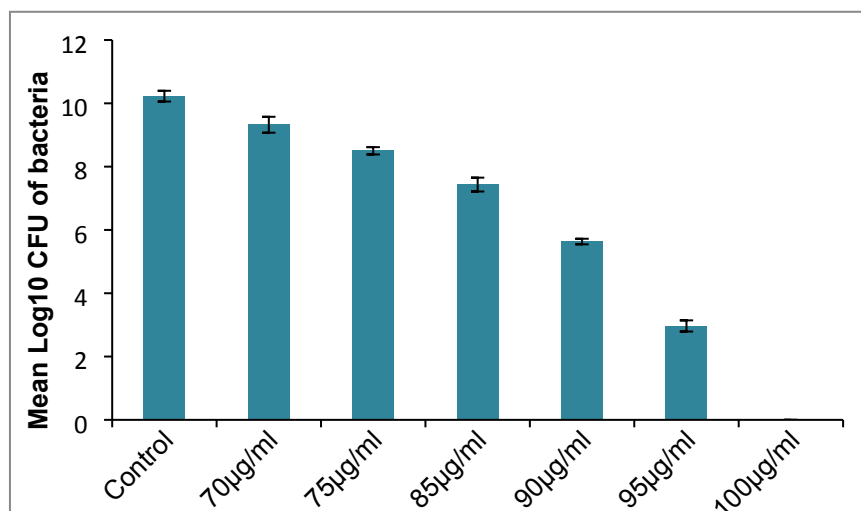



**Figure S12.** MIC and MBC value determination of P75 over MRSA 33591 strain

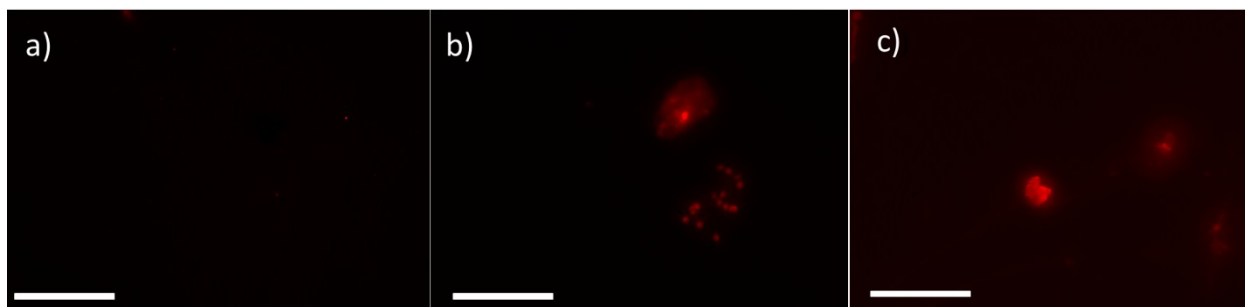

**Figure S13.** Fluorescence microscopy images of *S. aureus* after staining with PI exposed to the a) control cells, b) cells treated with polymer at their MIC value, c) cells treated with polymer at their MBC value. Scale bar 5 is μm.

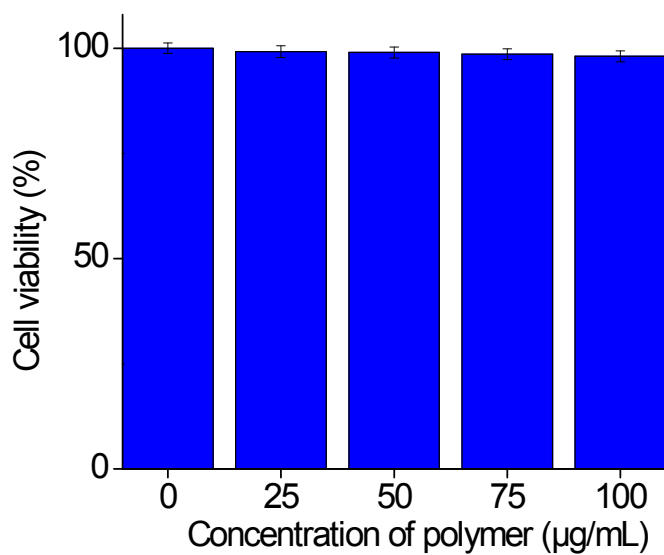

**Figure S14.** Cytotoxicity assay of P75 polymer in HeLa cell line
